# Supplementary material for: N6-methyladenosine–Mediated Upregulation of WTAPP1 Promotes WTAP Translation and Wnt Signaling to Facilitate Pancreatic Cancer Progression
Source: PubMed Central journal article supplement — Cancer Res. 2021 Aug 6;81(20):5268–83. doi: 10.1158/0008-5472.CAN-21-0494 (PMC9662857; doi:10.1158/0008-5472.can-21-0494), 2021-08-06
Supplement: can-21-0494_supplementary_figures_suppsf1-sf6.pdf [file can-21-0494_supplementary_figures_suppsf1-sf6.pdf]

Deng et al\_Supplementary Figure 1

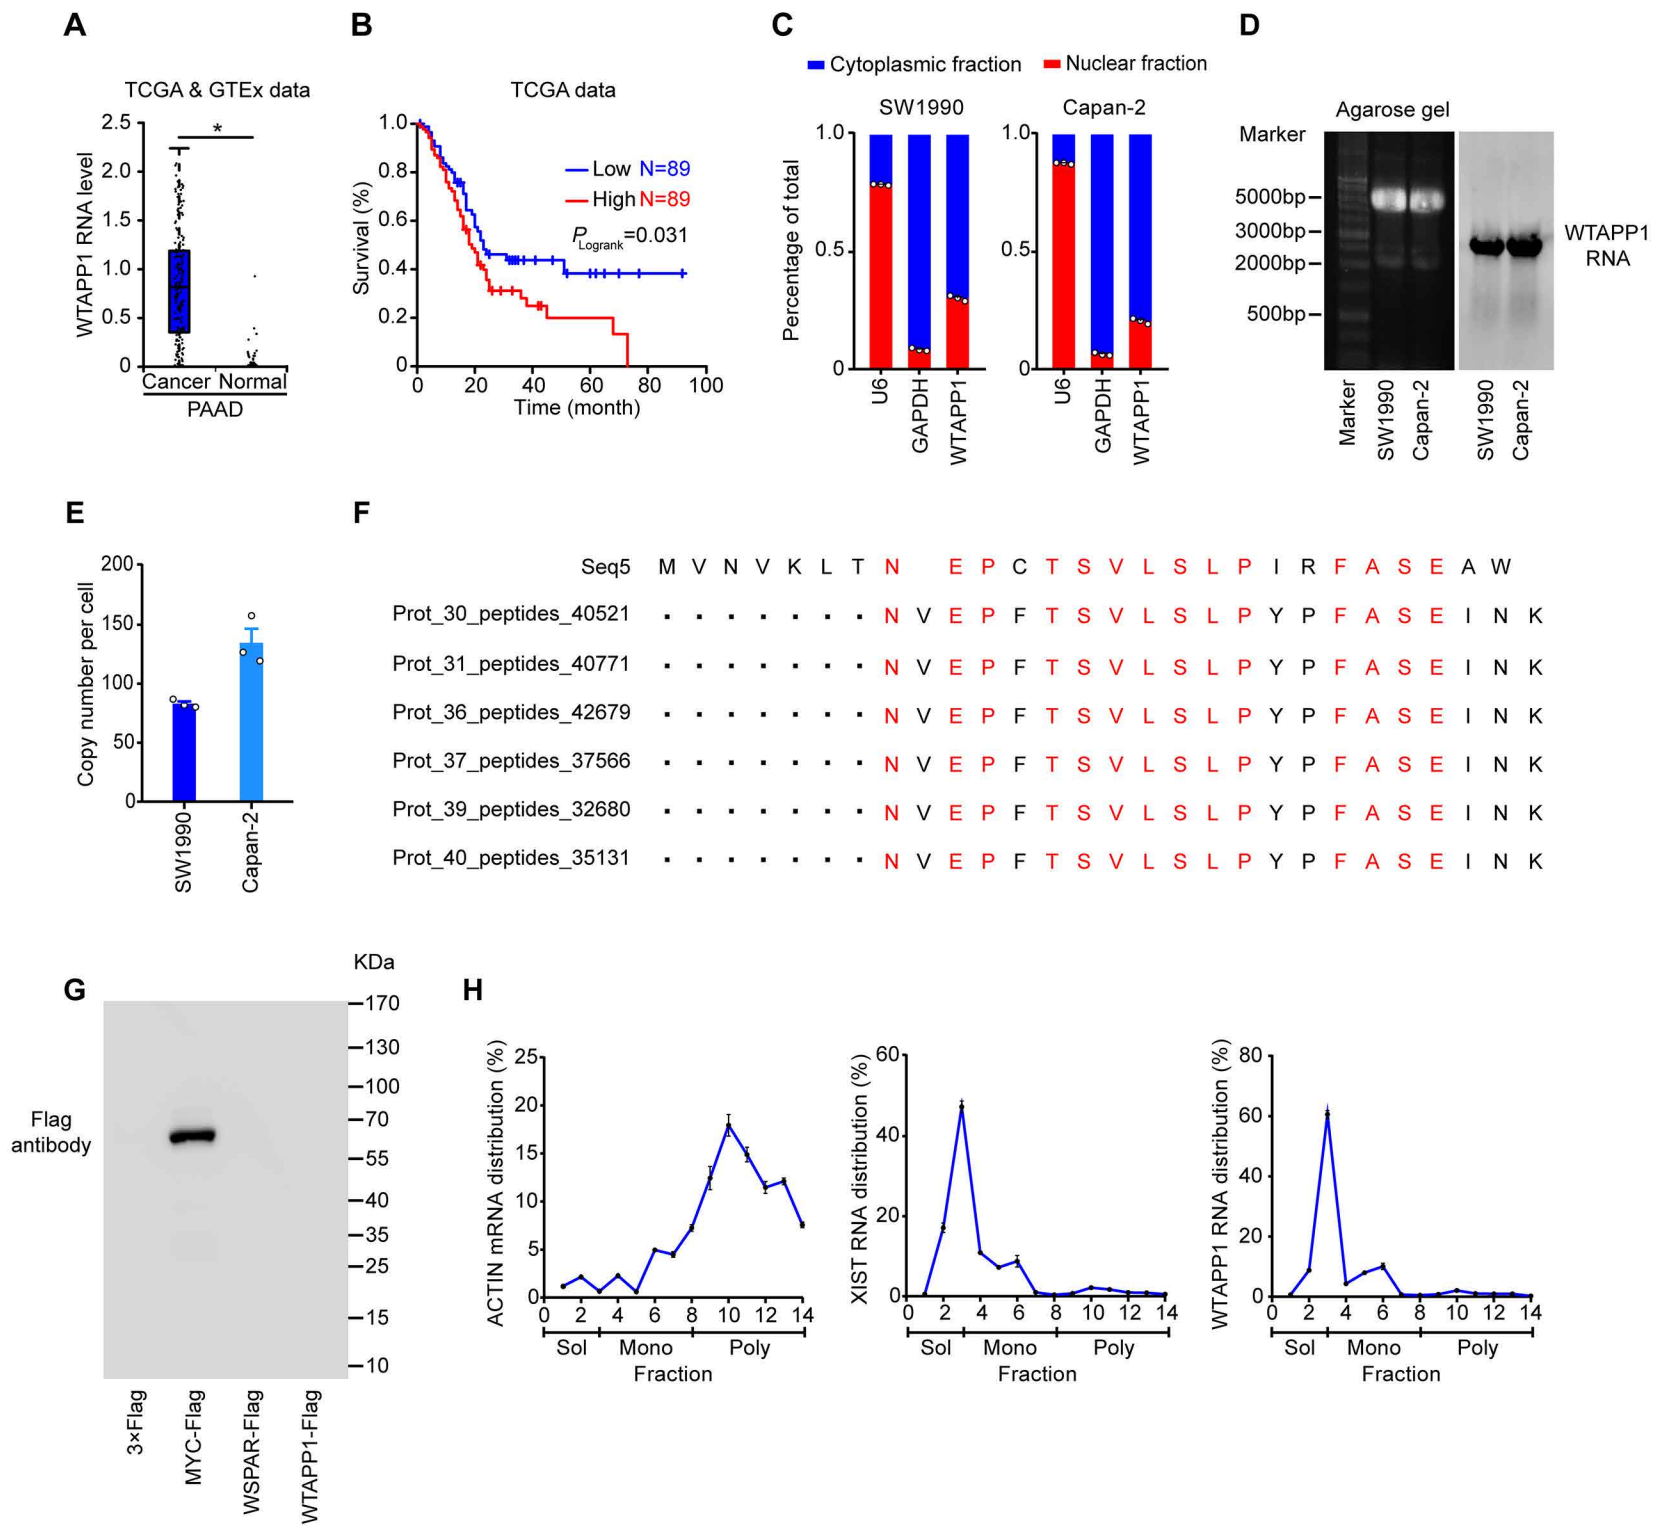

**Supplementary Fig. S1 Additional Figures related to Fig. 1** **(A)** *WTAPP1* RNA levels in PDAC tumors (N = 179) compared with non-tumor tissues (N = 171) in TCGA and GTEx databases from GEPIA (see URLs). **(B)** Kaplan-Meier plots of overall survival rate of PDAC patients in TCGA database from GEPIA by *WTAPP1* RNA level (N = 178, HR = 1.6) (see URLs). **(C)** Distribution of *WTAPP1* RNA in cytoplasm and nucleus of PDAC cells with *U6* and *GAPDH* as markers. **(D)** Existence of *WTAPP1* RNA in SW1990 and Capan-2 cells detected by Northern blotting analysis. 28S and 18S rRNAs were served as loading controls. **(E)** Copy number per cell of *WTAPP1* RNA in PDAC cell lines. **(F)** UniProt human protein profile of 20 PDAC lines in Cancer Cell Line Encyclopedia (CCLE) identified no peptides matching *WTAPP1* ORFs. **(G)** Western blot assays of cells with ectopic expression of FLAG- tagged full length *WTAPP1*. MYC (FLAG-tagged) was used as a positive control and lncRNA without coding potential, *WSPAR*, was used as a negative control. **(H)** Ribosome sedimentation analysis of  $\beta$ -*ACTIN*, *XIST* and *WTAPP1* from PDAC cells. Cell lysates were fractionated by sucrose gradient centrifugation. Data are mean  $\pm$  SEM from 3 independent RT-qPCR determinations.

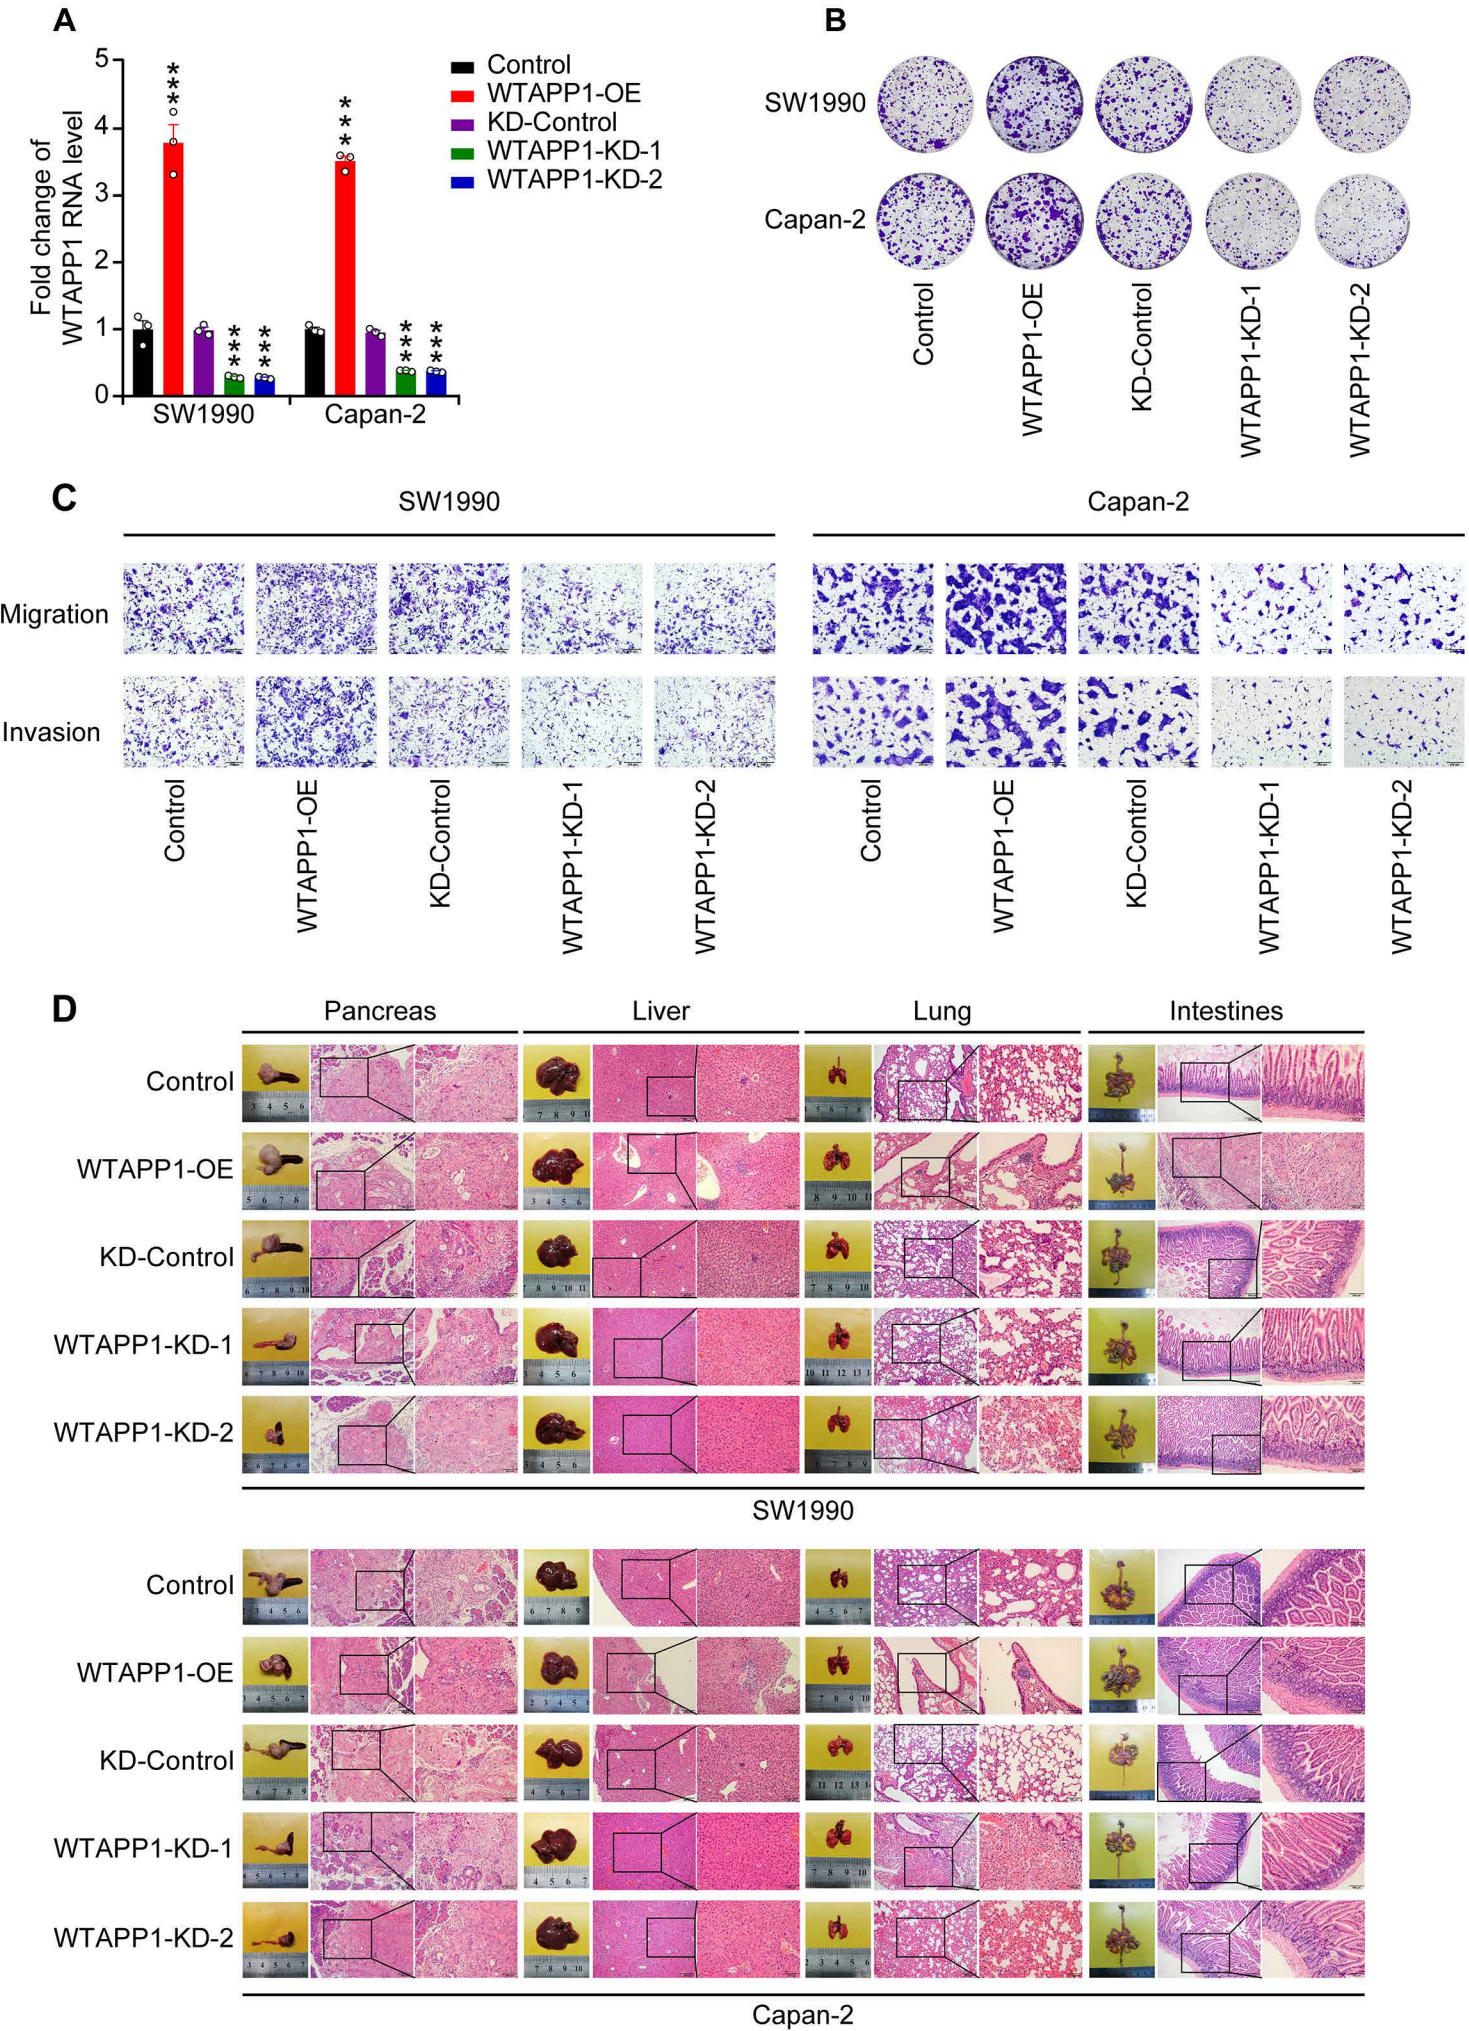

**Supplementary Fig. S2 Additional Figures related to Fig. 2 (A)** Overexpression or knockdown of *WTAPP1* in PDAC cells (N = 3). Data are mean  $\pm$  SEM; \*\*\*,  $P < 0.001$  of Student's *t*-test. **(B, C)** Effects of *WTAPP1* expression levels on the ability of colony formation **(B)** or migration and invasion **(C)** of PDAC cells. Scale bars, 200  $\mu$ m. **(D)** Histopathological images (H&E staining) the pancreas, liver, lung and intestines from mice transplanted with PDAC xenograft in the pancreas. Scale bars, 200  $\mu$ m and 100  $\mu$ m.

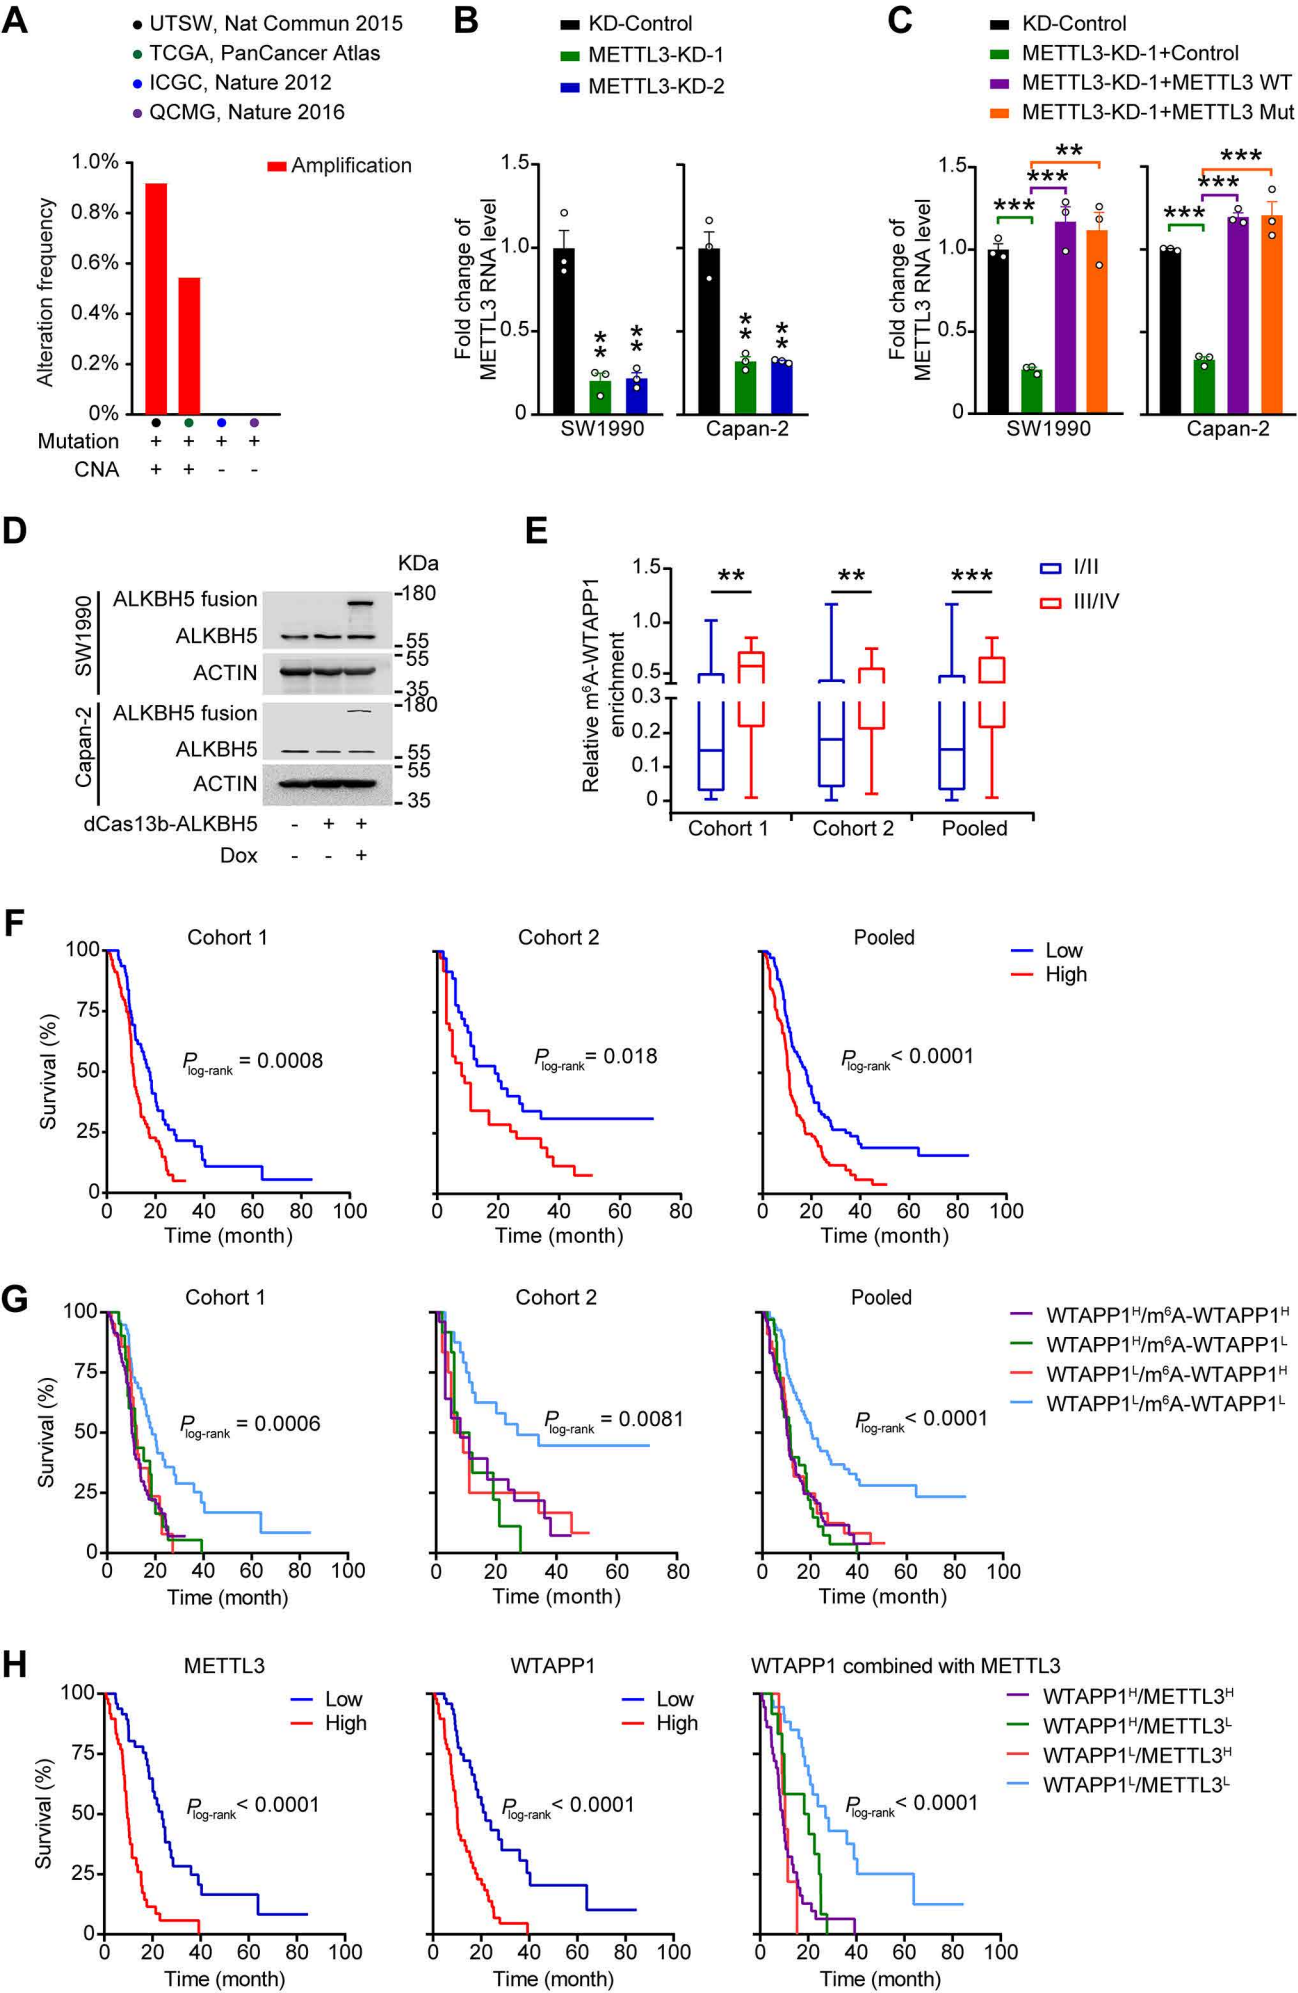

**Supplementary Fig. S3 Additional Figures related to Fig. 3 (A)** Genomic alterations including mutations and copy number alterations of *WTAPP1* in PDAC tissues derived from different datasets. **(B)** *METTL3* RNA levels in SW1990 and Capan-2 cells transfected with empty vector or vector containing *METTL3* siRNA. **(C)** *METTL3* RNA levels in *METTL3* knockdown cells transfected with vectors containing wild type *METTL3* or its mutant. **(D)** Expression of dCas13b-ALKBH5 fusion protein in PDAC cells with or without doxycycline induction, measured by Western blotting using ALKBH5 antibody. **(E)** m<sup>6</sup>A-*WTAPP1* RNA levels are significantly higher in Stage III/IV PDAC than that in stage I/II PDAC in patients of cohort 1 (N = 158), cohort 2 (n = 73) and combined sample (N = 231). **(F)** Kaplan-Meier estimates of overall survival time in PDAC patients from two cohorts and combined sample by m<sup>6</sup>A-*WTAPP1* level in tumor (Cohort 1, HR = 1.79, 95% CI = 1.25–2.57, Low, N = 79 and High, N = 79; Cohort 2, HR = 1.84, 95% CI = 1.08–3.12, Low, N = 36 and High, N = 37 and combined sample, HR = 1.79, 95% CI = 1.33–2.41, Low, N = 115 and High N = 116). **(G)** Kaplan-Meier estimates of combined overall survival by *WTAPP1* and m<sup>6</sup>A-*WTAPP1* levels in PDAC patients of two cohorts and combined sample (Cohort 1: *WTAPP1*<sup>high</sup>/m<sup>6</sup>A-*WTAPP1*<sup>high</sup>, N = 58; *WTAPP1*<sup>high</sup>/m<sup>6</sup>A-*WTAPP1*<sup>low</sup>, N = 21; *WTAPP1*<sup>low</sup>/m<sup>6</sup>A-*WTAPP1*<sup>high</sup>, N = 21; *WTAPP1*<sup>low</sup>/m<sup>6</sup>A-*WTAPP1*<sup>low</sup>, N = 58; Cohort 2: *WTAPP1*<sup>high</sup>/m<sup>6</sup>A-*WTAPP1*<sup>high</sup>, N = 25; *WTAPP1*<sup>high</sup>/m<sup>6</sup>A-*WTAPP1*<sup>low</sup>, N = 12; *WTAPP1*<sup>low</sup>/m<sup>6</sup>A-*WTAPP1*<sup>high</sup>, N = 12 and *WTAPP1*<sup>low</sup>/m<sup>6</sup>A-*WTAPP1*<sup>low</sup>, N = 24 and Cohort 3: *WTAPP1*<sup>high</sup>/m<sup>6</sup>A-*WTAPP1*<sup>high</sup>, N = 83; *WTAPP1*<sup>high</sup>/m<sup>6</sup>A-*WTAPP1*<sup>low</sup>, N = 33 and *WTAPP1*<sup>low</sup>/m<sup>6</sup>A-*WTAPP1*<sup>high</sup>, N = 33; *WTAPP1*<sup>low</sup>/m<sup>6</sup>A-*WTAPP1*<sup>low</sup>, N = 82) **(H)** Kaplan-Meier estimates of overall survival by *WTAPP1* or *METTL3* level in PDAC in 96 patients from Cohort 1 (*METTL3*: Low, N = 48 and High, N = 48; *WTAPP1*: Low, N = 48 and High, N = 48) and overall survival by *METTL3* and *WTAPP1* levels in 96 patients from Cohort 1: *WTAPP1*<sup>high</sup>/*METTL3*<sup>high</sup>, N = 36; *WTAPP1*<sup>high</sup>/*METTL3*<sup>low</sup>, N = 12; *WTAPP1*<sup>low</sup>/*METTL3*<sup>high</sup>, N = 12 and *WTAPP1*<sup>low</sup>/*METTL3*<sup>low</sup>, N = 36). Data in **(E)** are displayed in min to max boxplot and the difference was tested using Mann-Whitney test. Data in **(B, C)** are mean ± SEM from 3 independent RT-qPCR and the difference was examined by Student's *t*-test. \*\*, *P*<0.01 and \*\*\*, *P*<0.001.

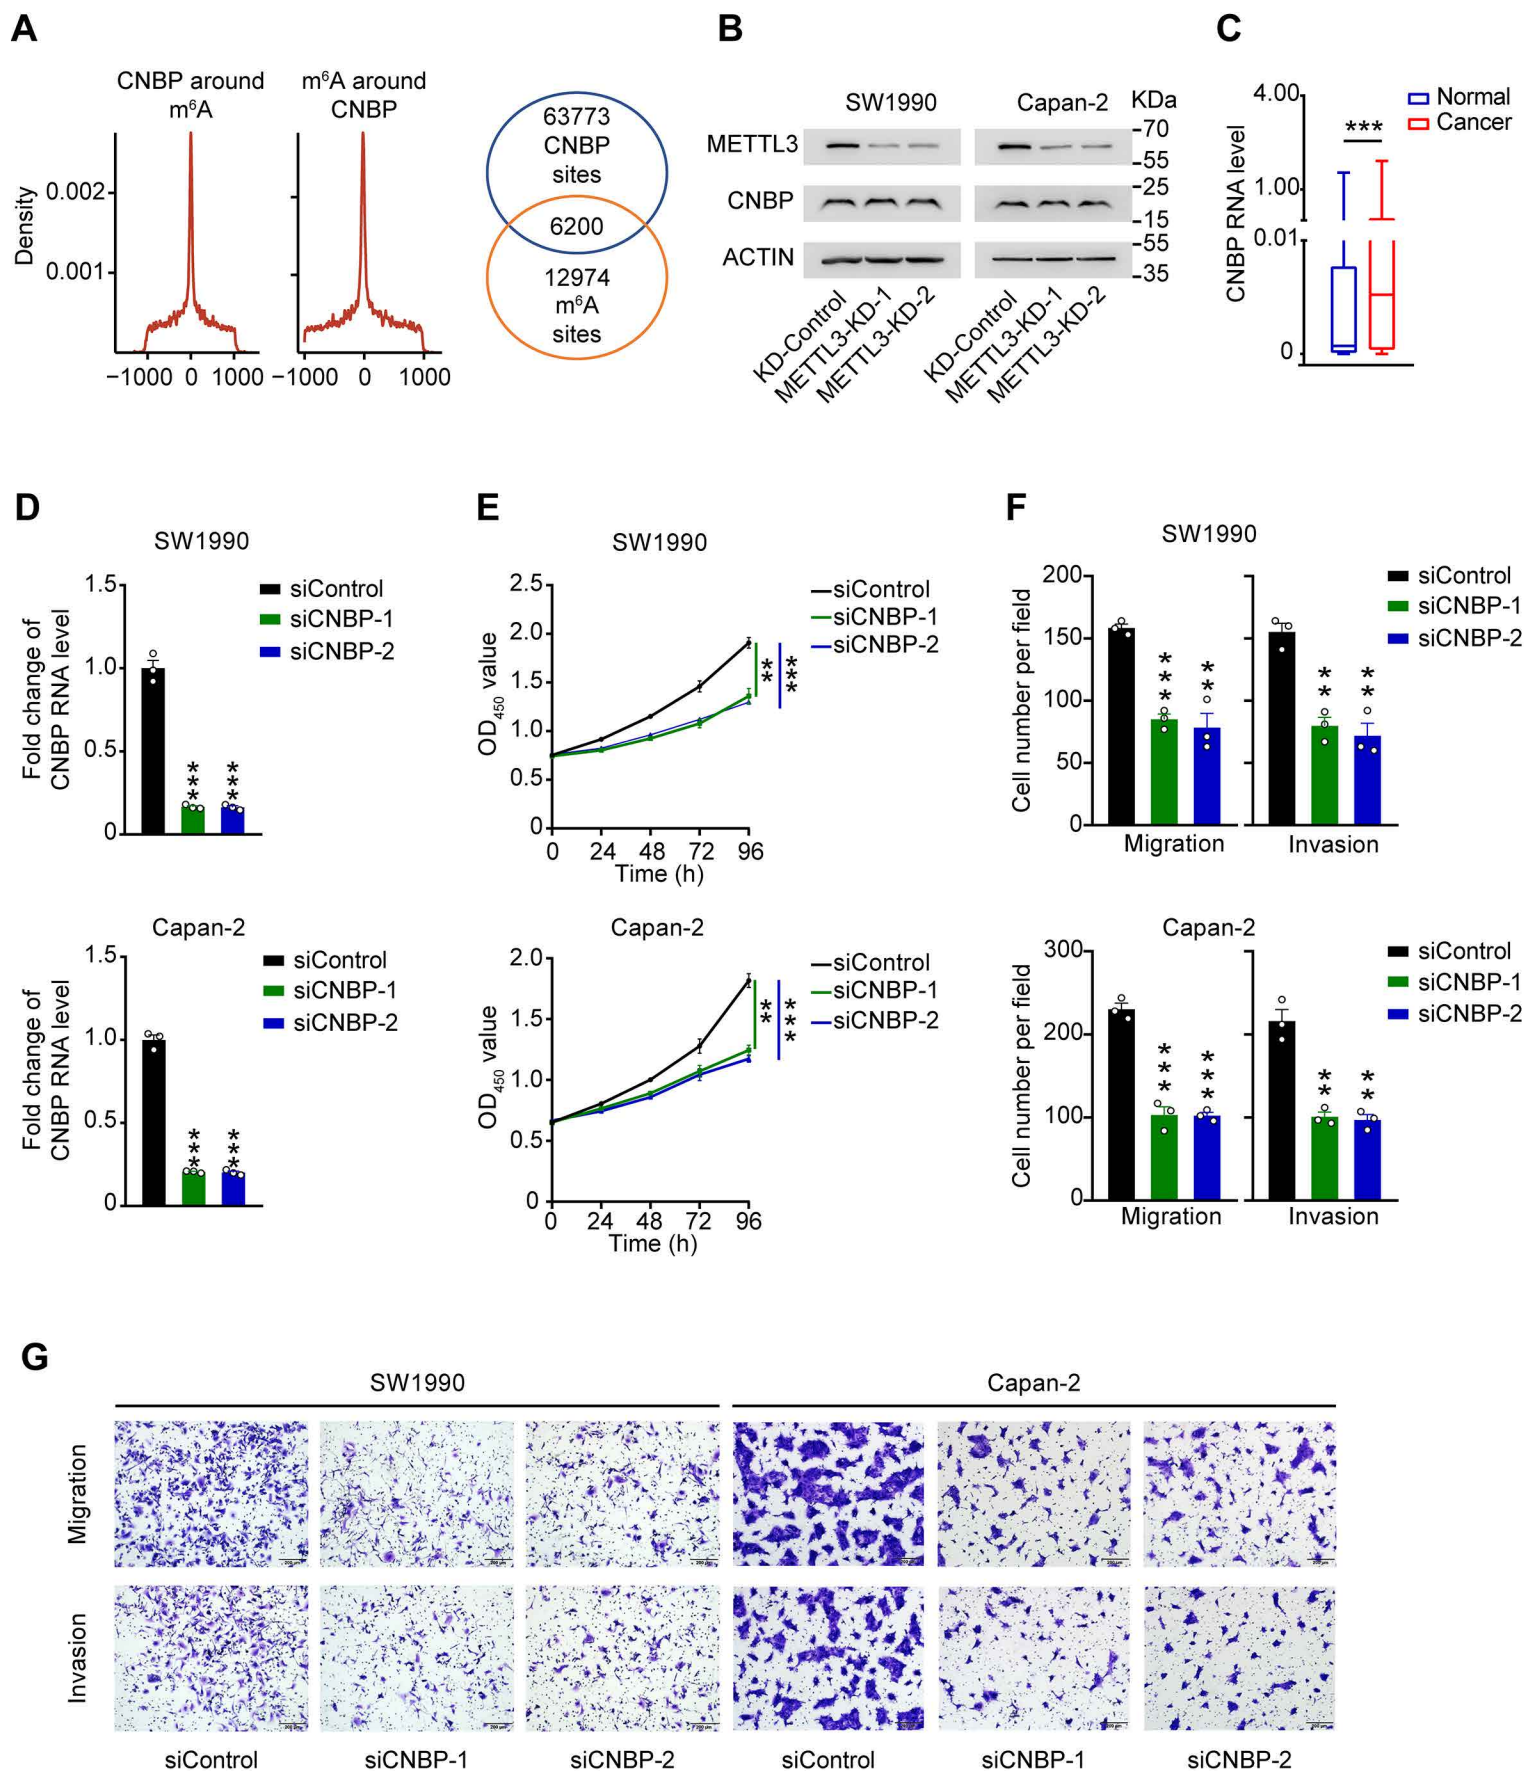

**Supplementary Fig. S4 Additional Figures related to Fig. 4 (A)** Intensity of CNBP binding centering m<sup>6</sup>A residues and m<sup>6</sup>A CLIP signal centering CNBP binding sites (*left panel*) and Venn diagram showing overlap between m<sup>6</sup>A residues and CNBP-binding sites (*right panel*). **(B)** Western blotting analysis of CNBP protein expression in PDAC cells with METTL3 knockdown. **(C)** Aberrant overexpression of *CNBP* RNA in surgically removed PDAC compared with corresponding non-tumor tissue samples (N = 158). **(D)** *CNBP* RNA levels in SW1990 and Capan-2 cells transfected with negative control or *CNBP* siRNA. **(E–G)** Effects of *CNBP* silence on PDAC cell proliferation **(E)** and migration or invasion **(F, G)**. Data in **(C)** are displayed in min to max boxplot and the difference was tested using Wilcoxon rank-sum test. Data in **(D–F)** are mean ± SEM from at least 3 independent experiments, and the difference was examined by Student's *t*-test. \*\*, *P*<0.01 and \*\*\*, *P*<0.001.

Deng et al\_Supplementary Figure 5

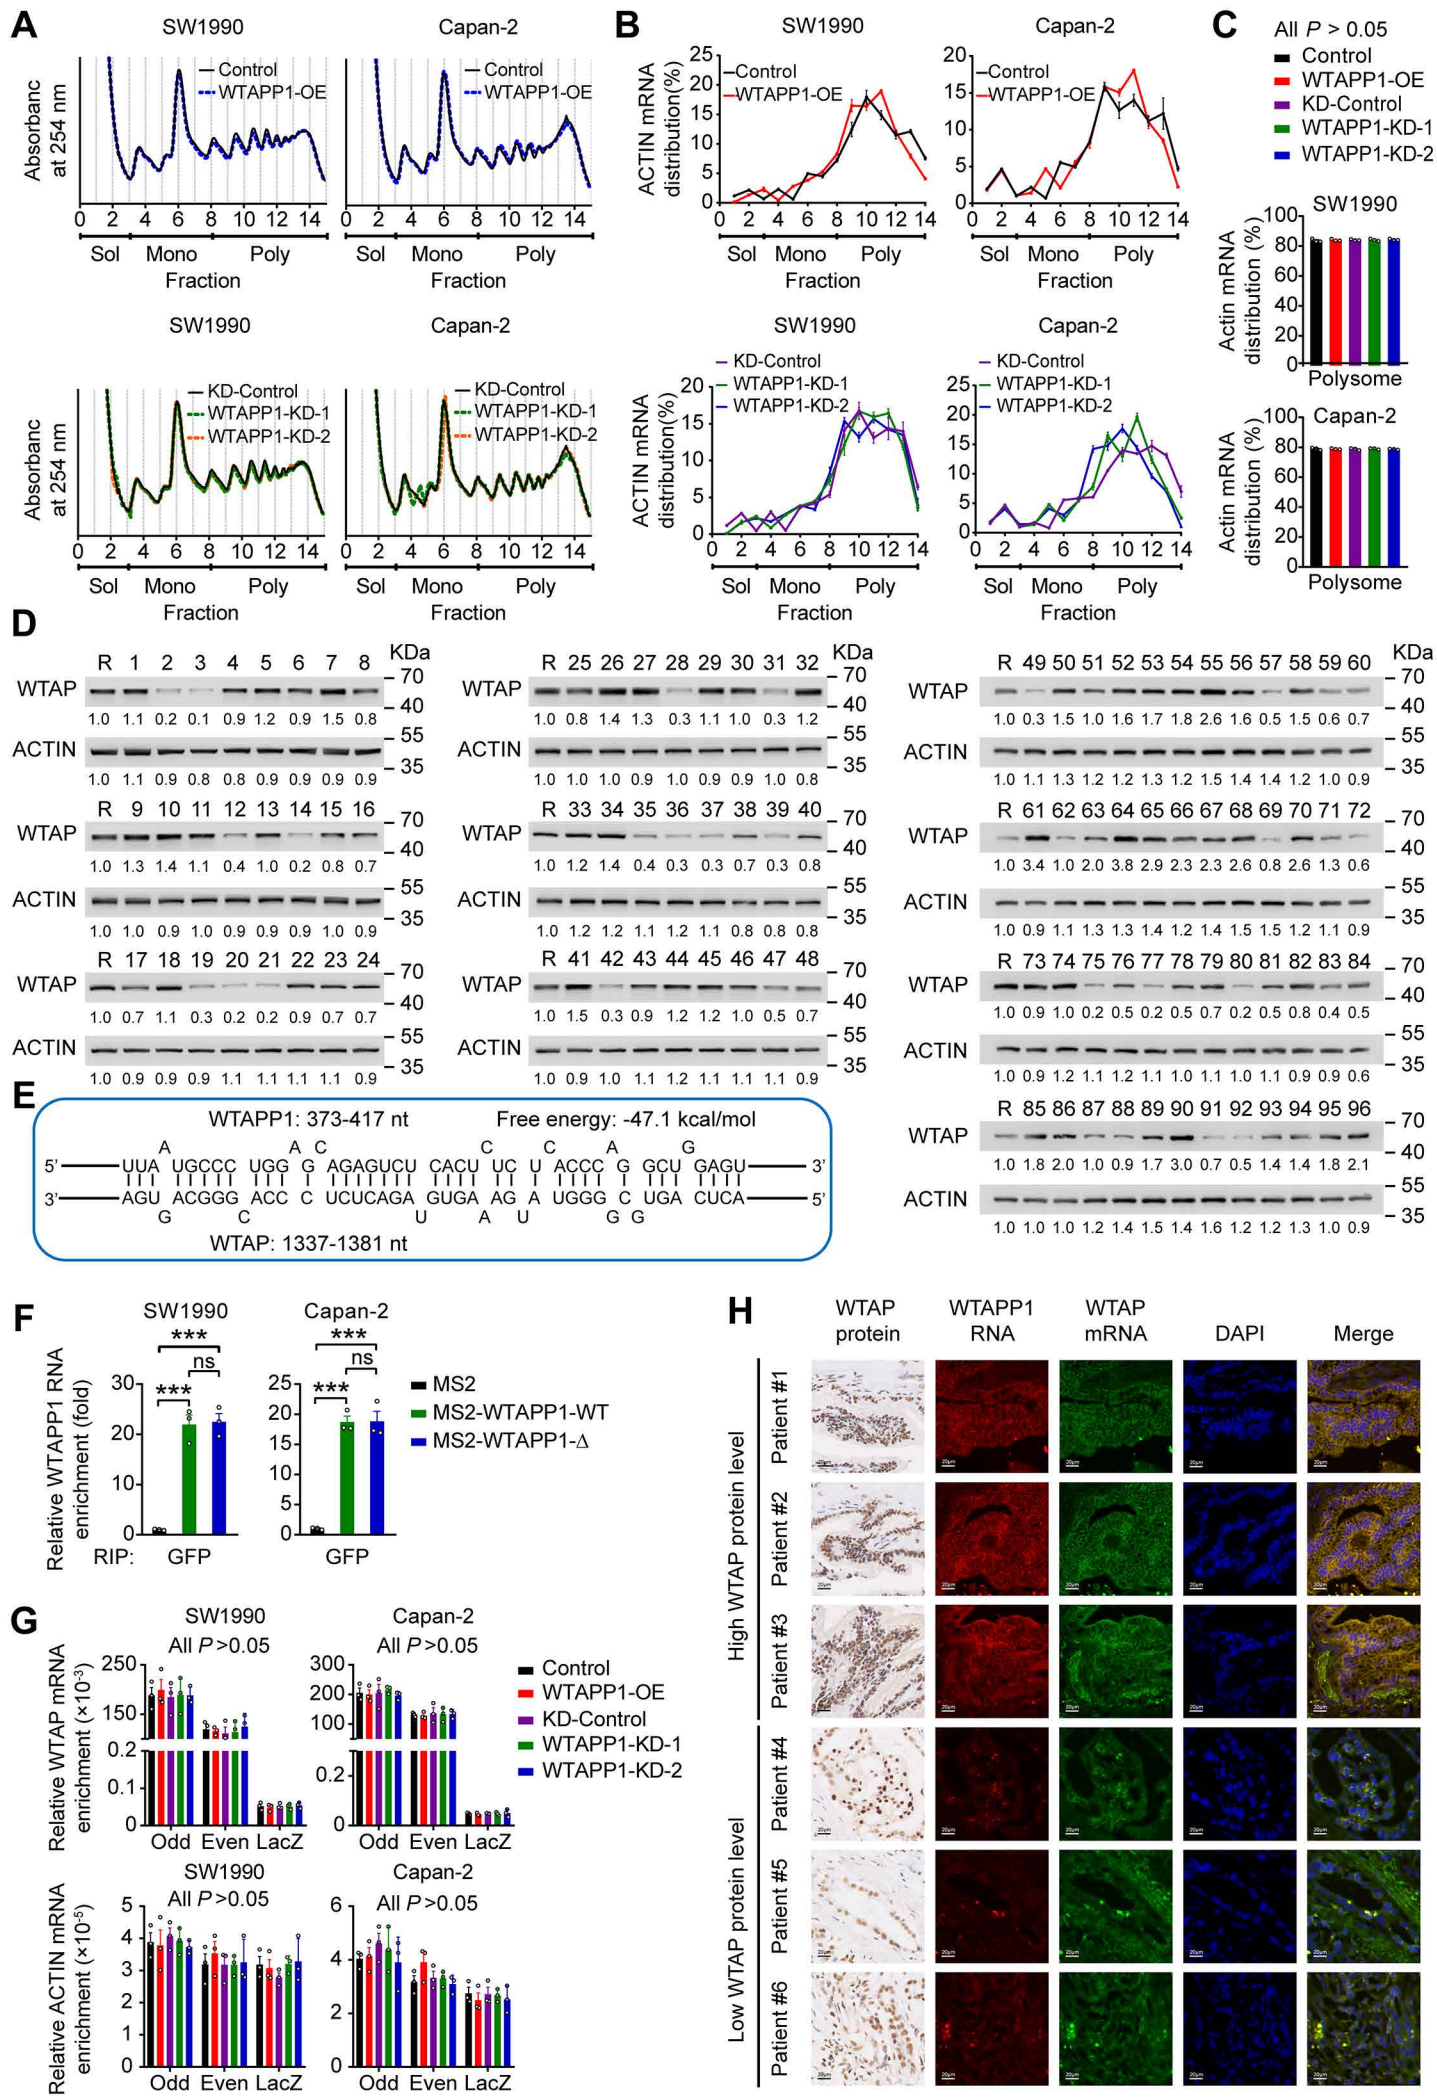

**Supplementary Fig. S5 Additional Figures related to Fig. 5 (A)** The polysome fractions in PDAC cells with altered *WTAPP1* expression, as shown with profiles of absorbance at 254nm, were separated by sucrose gradient centrifugation. **(B, C)** Polysome fraction analysis in cells by sucrose gradient centrifugation. The level of  $\beta$ -*ACTIN* mRNA in each gradient fraction was measured by RT-qPCR and plotted as a percentage of total  $\beta$ -*ACTIN* mRNA level in that sample **(B)**. Polysome fractions are shown as bar graph **(C)**. **(D)** Western blot analysis of WTAP protein levels in PDAC tissues (N = 96). R represents the same positive reference sample for loading adjustment on each gel. Each protein band was semi-quantified by gray density and the value for each band is relative to density of corresponding band of R. **(E)** Predicted binding sites of *WTAPP1* RNA and *WTAP* RNA. **(F)** MS2-RIP assays show the levels of *WTAPP1* RNA enriched by anti-GFP antibody in cells with ectopic expression of wild-type *WTAPP1* (MS2-*WTAPP1*-WT) or *WTAPP1* with binding sites deletion (MS2-*WTAPP1*- $\Delta$ ). **(G)** Results of ChIRP assays using PDAC cell lysate and either *WTAP* mRNA even, odd probe set or LacZ probe set as negative control. Purified RNA was analyzed by RT-qPCR with primers specific for *WTAP* and  $\beta$ -*ACTIN* mRNA. **(H)** Fluorescence in situ hybridization (FISH) of *WTAPP1* and *WTAP* RNA in 6 PDAC samples were grouped by weak or strong Immunohistochemical staining of WTAP proteins. Scale bars, 20  $\mu$ m. Data are mean  $\pm$  SEM from 3 independent RT-qPCR analyses and the difference was examined by Student's *t*-test unless specifically indicated.

Deng et al\_Supplementary Figure 6

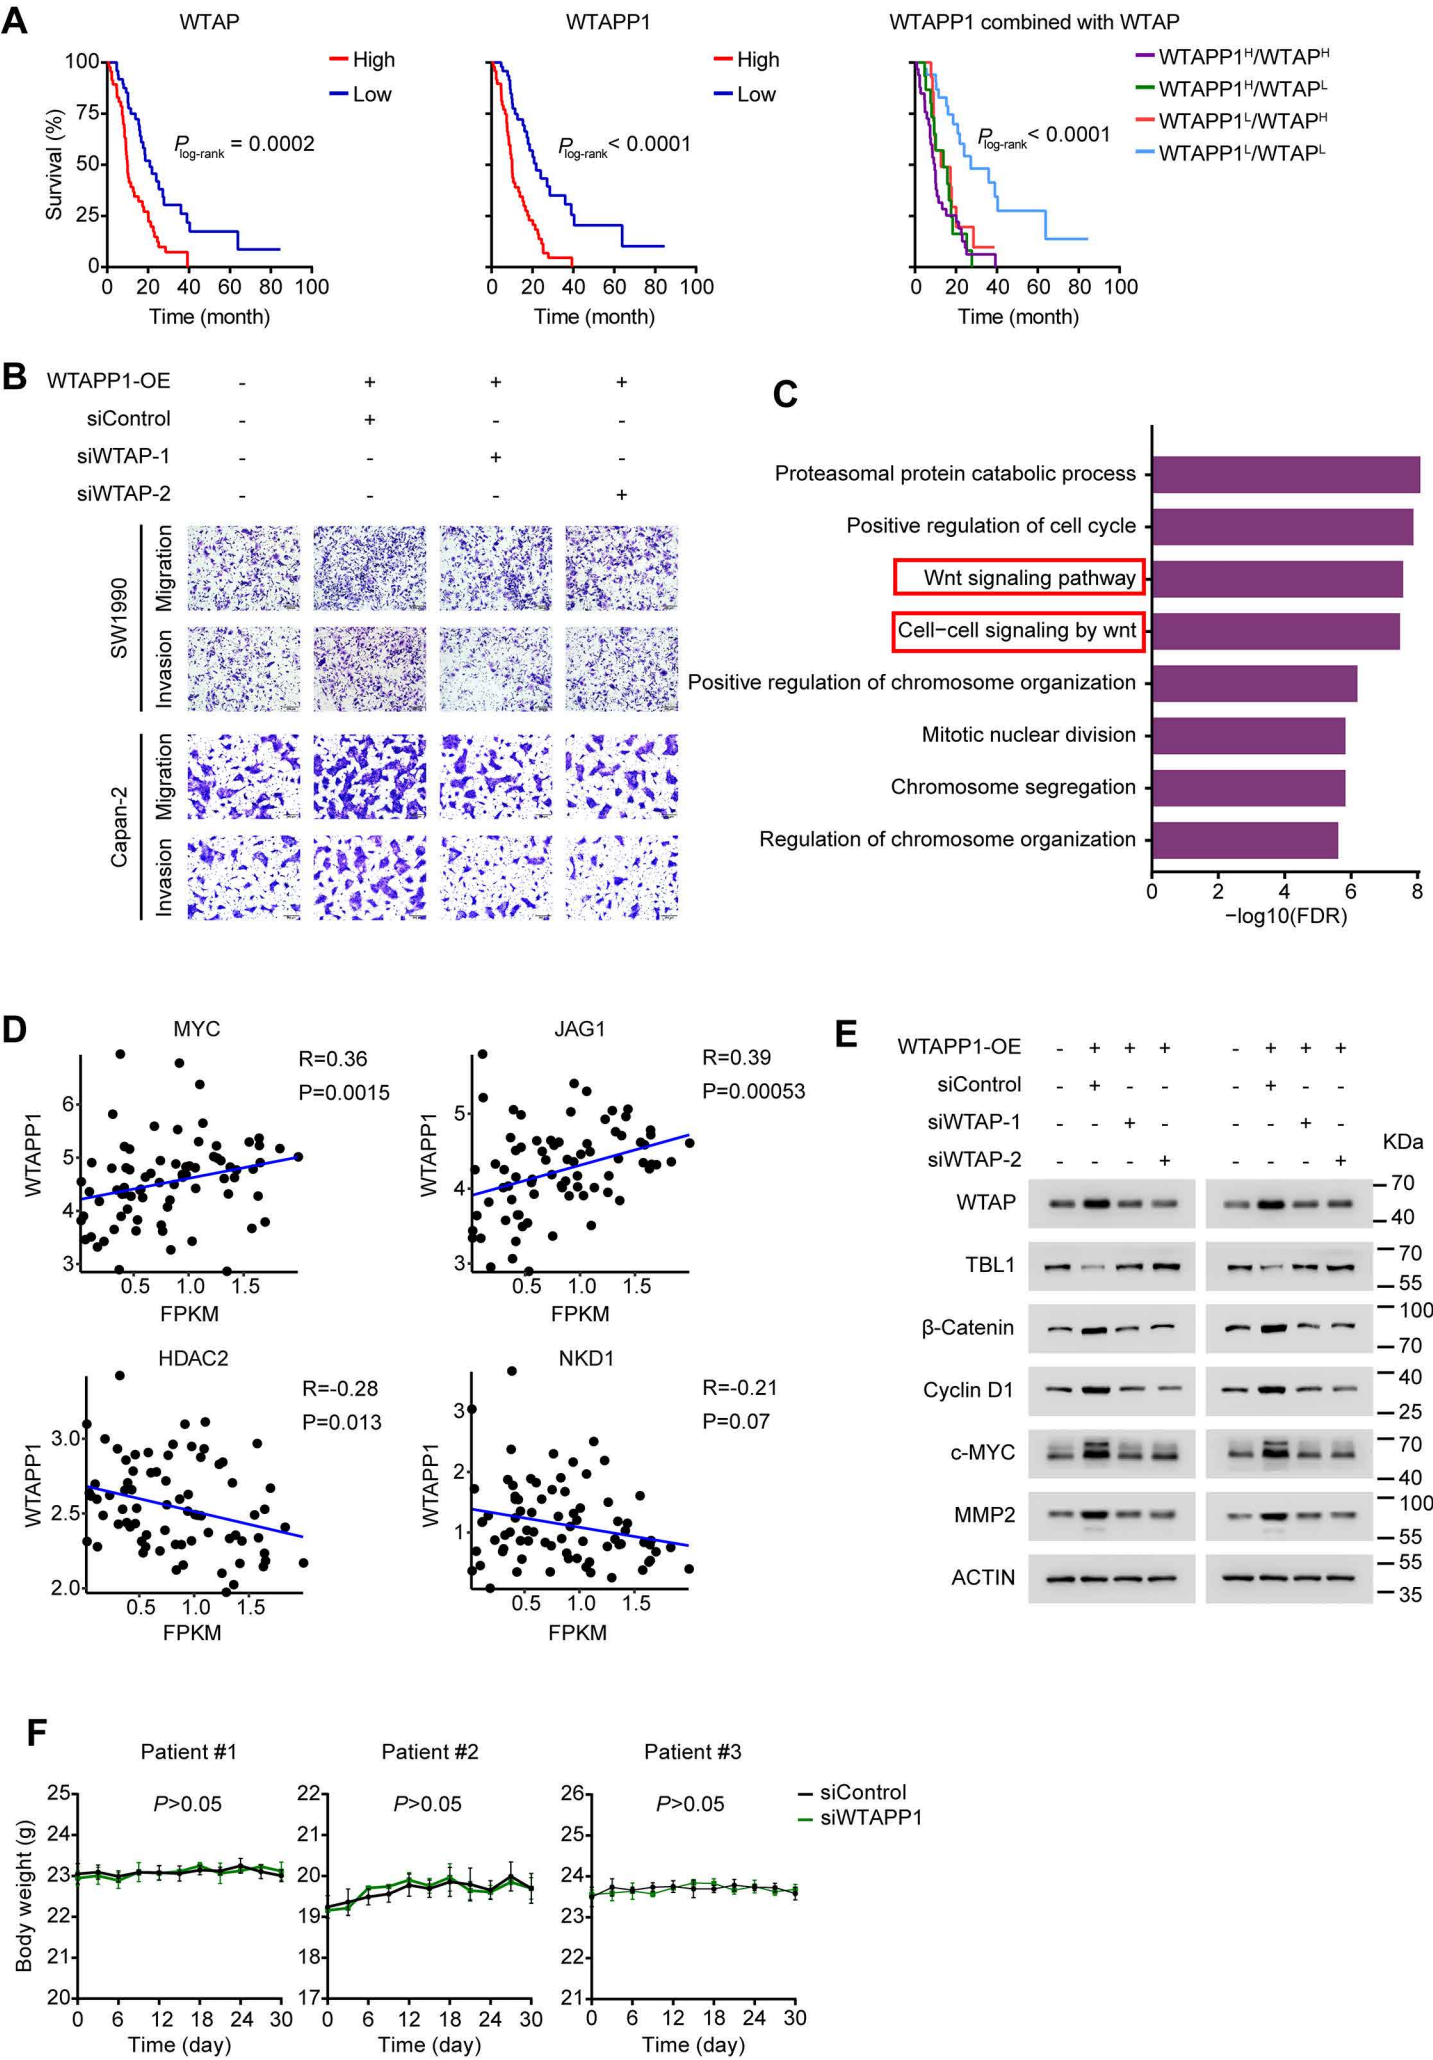

**Supplementary Fig. S6 Additional Figures related to Fig. 6 and 7 (A)** Kaplan-Meier estimates of overall survival by *WTAPP1* RNA or WTAP protein levels in 96 PDAC patients from Cohort 1 (WTAP: Low, N = 49 and High, N = 47; *WTAPP1*: Low, N = 48 and High, N = 48) and by WTAP and *WTAPP1* levels: *WTAPP1*<sup>high</sup>/WTAP<sup>high</sup>, N = 33; *WTAPP1*<sup>high</sup>/WTAP<sup>low</sup>, N = 15; *WTAPP1*<sup>low</sup>/WTAP<sup>high</sup>, N = 14 and *WTAPP1*<sup>low</sup>/WTAP<sup>low</sup>, N = 34). **(B)** Silencing WTAP expression inhibited PDAC cell migration and invasion caused by *WTAPP1* overexpression. Scale bars, 200  $\mu$ m. **(C)** Gene ontology (GO) analysis of differentially expressed genes identified by RNA sequencing in pancreatic cancer cells with or without *WTAPP1* knockdown ( $|\text{Foldchange}| \geq 2$ ). **(D)** Correlation between the *WTAPP1* RNA levels and Wnt signaling pathway regulators in PDAC samples from TCGA database. *MYC* and *JAG1* are positive regulators while *HDAC2* and *NKD1* are negative regulators in the Wnt pathway. **(E)** Western blot analysis shows WTAP silence substantially decreased signaling molecules downstream WTAP in cells with *WTAPP1* overexpression. **(F)** Body weight gain (mean  $\pm$  SEM) of PDX mice treated with or without siWTAPP1. All  $P > 0.05$  of Student's *t*-test.
