# Supplementary material for: N6-methyladenosine–Mediated Upregulation of WTAPP1 Promotes WTAP Translation and Wnt Signaling to Facilitate Pancreatic Cancer Progression
Source: PubMed Central journal article supplement — Cancer Res. 2021 Aug 6;81(20):5268–83. doi: 10.1158/0008-5472.CAN-21-0494 (PMC9662857; doi:10.1158/0008-5472.can-21-0494), 2021-08-06
Supplement: can-21-0494_supplementary_tables_suppst1-st6.pdf [file can-21-0494_supplementary_tables_suppst1-st6.pdf]

**Supplementary Table S1.** Baseline demographic and clinical characteristics of individuals with pancreatic ductal adenocarcinoma in this study

|                                | Cohort 1 (Guangzhou) |                     | Cohort 2 (Beijing) |                    | Pooled sample   |                     |
|--------------------------------|----------------------|---------------------|--------------------|--------------------|-----------------|---------------------|
|                                | Alive<br>(N=36)      | Deceased<br>(N=122) | Alive<br>(N=17)    | Deceased<br>(N=56) | Alive<br>(N=53) | Deceased<br>(N=178) |
| Age, mean (SD <sup>a</sup> )   | 59.8 (11.7)          | 61.1 (11.4)         | 59.1 (8.6)         | 63.1 (11.2)        | 59.6 (10.8)     | 61.7 (11.3)         |
| Sex, N (%)                     |                      |                     |                    |                    |                 |                     |
| Male                           | 23 (63.9)            | 68 (55.7)           | 10 (58.8)          | 35 (62.5)          | 33 (62.3)       | 103 (57.9)          |
| Female                         | 13 (36.1)            | 54 (44.3)           | 7 (41.2)           | 21 (37.5)          | 20 (37.7)       | 75 (42.1)           |
| Differentiation, N (%)         |                      |                     |                    |                    |                 |                     |
| Well                           | 7 (19.4)             | 13 (10.7)           | 4 (23.5)           | 6 (10.7)           | 11 (20.8)       | 19 (10.7)           |
| Moderate                       | 22 (61.1)            | 81 (66.4)           | 10 (58.8)          | 31 (55.4)          | 32 (60.4)       | 112 (62.9)          |
| Poor                           | 7 (19.4)             | 28 (23.0)           | 3 (17.6)           | 19 (33.9)          | 10 (18.9)       | 47 (26.4)           |
| Lymph node metastasis, N (%)   |                      |                     |                    |                    |                 |                     |
| Positive                       | 14 (38.9)            | 66 (54.1)           | 10 (58.8)          | 27 (48.2)          | 24 (45.3)       | 93 (52.2)           |
| Negative                       | 22 (61.1)            | 56 (45.9)           | 7 (41.2)           | 29 (51.8)          | 29 (54.7)       | 85 (47.8)           |
| Vascular invasion, N (%)       |                      |                     |                    |                    |                 |                     |
| Yes                            | 10 (27.8)            | 39 (32.0)           | 6 (35.3)           | 27 (48.2)          | 16 (30.2)       | 66 (37.1)           |
| No                             | 26 (72.2)            | 83 (68.0)           | 11 (64.7)          | 29 (51.8)          | 37 (69.8)       | 112 (62.9)          |
| Neural invasion, N (%)         |                      |                     |                    |                    |                 |                     |
| Yes                            | 23 (63.9)            | 74 (60.7)           | 4 (23.5)           | 10 (17.9)          | 27 (50.9)       | 84 (47.2)           |
| No                             | 13 (36.1)            | 48 (39.3)           | 13 (76.5)          | 46 (82.1)          | 26 (49.1)       | 94 (52.8)           |
| TNM stage <sup>b</sup> , N (%) |                      |                     |                    |                    |                 |                     |
| I                              | 1 (2.8)              | 7 (5.7)             | 4 (23.5)           | 9 (16.1)           | 5 (9.4)         | 16 (9.0)            |
| II                             | 29 (80.6)            | 99 (81.1)           | 11 (64.7)          | 27 (48.2)          | 40 (75.5)       | 126 (70.8)          |
| III                            | 0 (0.0)              | 4 (3.3)             | 2 (11.8)           | 10 (17.9)          | 2 (3.8)         | 14 (7.9)            |
| IV                             | 6 (16.7)             | 12 (9.8)            | 0 (0.0)            | 10 (17.9)          | 6 (11.3)        | 22 (12.4)           |

<sup>a</sup>SD, standard deviation.<sup>b</sup>Tumor TNM staging were reviewed by at least 3 pathologists and defined according to the American Joint Committee on Cancer (AJCC) 8th edition.

**Supplementary Table S2.** Sequences of siRNAs and gRNAs in this study

| Sequences of siRNA |                                          |
|--------------------|------------------------------------------|
| siControl          | 5'-UUCUCCGAACGUGUCACGUTT-3'              |
| siFER1L4           | 5'-GGGUCAACCUCAUUUCUAUTT-3'              |
| siRP11-356M20.1    | 5'-GCAAAGAGCGAUCCUCUAATT-3'              |
| siAC073150.6       | 5'-CCAGGAUCACCCAGUCUUUTT-3'              |
| siDUXAP9           | 5'-CCAGGAAUUGUGAGAUAATT-3'               |
| siPSMC1P2          | 5'-GCAAUCUGCACAGAAGCUATT-3'              |
| siCELP             | 5'-CCAUCAACAAGGGCAACAATT-3'              |
| siEGFEM1P          | 5'-GCUCUGCAUCAACUAUUUATT-3'              |
| siAC093724.2       | 5'-CCAGGUGAACCACACAGUATT-3'              |
| siMXRA5Y           | 5'-GCUGCAGAUGGGUAGAAUATT-3'              |
| siWTAPP1-1         | 5'-GCACAUGCCUCACAGAAUUTT-3'              |
| siWTAPP1-2         | 5'-GCAAGAACGCUGACCUCAATT-3'              |
| siWTAP-1           | 5'-CACAGAUCUUAACUCUAAUTT-3'              |
| siWTAP-2           | 5'-GACCCAGCGAUAACUUGUTT-3'               |
| siMETTL3-1         | 5'-GGAGAUCCUAGAGCUAUUATT-3'              |
| siMETTL3-2         | 5'-GCACAUCCUACUCUUGUAATT-3'              |
| siCNBP-1           | 5'-CCAGACAUUUGUUAUCGCUTT-3'              |
| siCNBP-2           | 5'-GAGGAUGCCUGCUAUAACUTT-3'              |
| siEIF3B-1          | 5'-GGAAGCAGAUGGAAUCGAUTT-3'              |
| siEIF3B-2          | 5'-GCACCUACCUGGCUACCUUTT-3'              |
| Sequences of sgRNA |                                          |
| WTAPP1-gRNA1       | GCTGGCGGTGGGTGACCACGGCCGCATCTGGGAGGCGACT |
| WTAPP1-gRNA2       | GCTGCCGTGAGGAAAGCCAGCCTCAAGGGGACTGAATAAG |

**Supplementary Table S3.** Primers used for quantitative real time-PCR and other assays in this study

| <b>Gene</b>                                      | <b>Forward primer (5'→3')</b>         | <b>Reverse primer (5'→3')</b> |
|--------------------------------------------------|---------------------------------------|-------------------------------|
| <i>WTAPP1</i>                                    | TTCTCAGTGCAAGGTGGTGA                  | CGAGCTCCTGTTTATTGCACC         |
| <i>WTAP</i>                                      | CTTCCCTTACTGAGCTTGCTG                 | TGGGAAGAGGTTCTTCGTTGG         |
| <i>CNBP</i>                                      | ACTGCGACCATGCAGATGAG                  | CAGAAAAAGGAGGGGCGACA          |
| <i>XIST</i>                                      | CCTACCGCTTTGGCAGAGAA                  | AGCCCTAAGCCGAGTTATGC          |
| <i>METTL3</i>                                    | AGATGGGGTAGAAAGCCTCCT                 | TGGTCAGCATAGGTTACAAGAGT       |
| <i>GAPDH</i>                                     | TTGGCCAGGGGTGCTAAG                    | AGCCAAAAGGGTCATCATCTC         |
| <i>U6</i>                                        | CTCGCTTCGGCAGCACA                     | AACGCTTCACGAATTTGCGT          |
| <i>β-Actin</i>                                   | CAGGGCGTGATGGTGGGCATG                 | GTAGAAGGTGTGGTGCCAGATT        |
| <b>Primers used for MeRIP-qPCR and CLIP-qPCR</b> |                                       |                               |
| WTAPP1-Forward                                   | CAAACGGATGGCAGGAGATG                  |                               |
| WTAPP1-Reverse                                   | GAGGTTGAGGTCAGCGTTCT                  |                               |
| <b>Primers used for in vitro transcription</b>   |                                       |                               |
| WTAPP1-Sense-Forward                             | TAATACGACTCACTATAATCTGTAAAATGGGGTGGAT |                               |
| WTAPP1-Sense-Reverse                             | GAAGTGGAGGCTGATGATCTTTATT             |                               |
| WTAPP1-Antisense-Forward                         | TAATACGACTCACTATAGAAGTGGAGGCTGATGATCT |                               |
| WTAPP1-Antisense -Reverse                        | ATCTGTAAAATGGGGTGGATATAAC             |                               |

**Supplementary Table S4.** Sequences of probes used in this study

---

**Probe used for WTAPP1 RNA Northern blot**

---

CATACTCACTCACACTCACCAGTCTGCGACCATGTAGACAAGCCAGTGAGCCTCATGTGCACA  
GCTGTGGGATGTGGGAGGAAACCAAGTACCCAGAGAAAATCCACAAAGACACAGGGAGAA  
CCTGAAAACCTCCACACAGACCATGGCCCTGACCGGAAATGGATTTTTTTCTCTTCGACGTCAT  
AACTAATCCATGTTATTTGAAGACCTGCTCTTTAGAGTTTCTAAGTCACTATGCTCAAGGGTAA  
GAGCAATGCATAGTCCATTTTCCATTTTACTGGAATTTATGTTCAATTCATGATTTAAAGTCTCC  
AGGTTTTCAATTTCTCCGAACTGTCCAAAGACATTGTGTGCCTTAGGACCTGTTTCTCCCTCTAT  
TTTCTTCAAACAGAAACATTTCTCAAGTATCCACATGTTCCCAAAGAGGAATTCTTCAGAGGT  
GGCCGCTTCTTTGGGATAGTGCAAGTCTACCAGGCTTCTGAAGCAAAGCGGATGGGGAGGG  
AAAGAACTGAAGTGCAAGGTTTATTGGTAAGTTTACATTAACCATTAGGAGCTGGGGAGTAT  
AAAAATGCGGCTTTTTTCTTTCTCTCAAAAAGTCTGAGTGTTGGTGTAGAAACGAGTCCTT  
GGCTGTCCCCCAGTGACTTTCTAGTAGTGGGACTGTCAGGGAAGCCTTGACTGAGAATATG  
ACTGGAGAGTTTACCTACCAGGCGTAAACTTCCAGGCACTCTGTTTCAATTTGGGCTTGTCCC  
GTTTGTCTTCAGTCAGGGCCAGATCACCTTTTCAATTTTAGGAAAACAGGTTGATGGCTCGGTC  
TACCATTGTTGATCGGGCCACGCTGGGCCACAGATTTGCTGGAGGTACTAAATTCGGGTAGG  
ACGCCTCGCATCTCCTGCCTTTGTCTGCTAGTCGCATCGCAAGGACGTTTGCCTCCGCGCAGA  
CTCTTGCTGCTTTTGTCTTAGTTTTCACTGAGGTTGAGGTCAGCGTTCTTGCCTCCAAAGCTTG  
CGCATGTGTTTCATATTGTTTCCATTTTAGAA TTCATTCATCTCCTGCCATCCGTT

---

**Probe used for ChIRP assay**

---

|               |                      |
|---------------|----------------------|
| WTAP-probe-1  | CAAGCTCAGTAAGGGAAGCG |
| WTAP-probe-2  | TCTTGAATCAGGAGAGTCGC |
| WTAP-probe-3  | TTCGACACTTCGCCATTAAC |
| WTAP-probe-4  | GAAGTCATTCAGTTCATCCT |
| WTAP-probe-5  | ACAGGTTCAGAAGCTGTAGT |
| WTAP-probe-6  | CATTCCCTGGAGAAGAAGGA |
| WTAP-probe-7  | GTGGGAGAGTCTACACTTTC |
| WTAP-probe-8  | ATTCTGAACGTGGCGGGAAC |
| WTAP-probe-9  | ATTTTCTGGACAGTATCCTC |
| WTAP-probe-10 | CCCTACACAAAATGTCCTTT |
| WTAP-probe-11 | ATGAGTACGAATGCCCTTAC |
| WTAP-probe-12 | ACTCCATCAATGAGTCCAAC |
| WTAP-probe-13 | GGAGTCACAGAGCAATATGC |

---

**Supplementary Table S5.** Prediction of the coding potential of WTAPP1

| <b>Predicted potential peptides of WTAPP1</b>                           |                |                   |                                                                                                                                                     |                    |           |
|-------------------------------------------------------------------------|----------------|-------------------|-----------------------------------------------------------------------------------------------------------------------------------------------------|--------------------|-----------|
| sORF ID                                                                 | Start position | End position      | sORF potential peptide sequence                                                                                                                     |                    |           |
| Seq1                                                                    | 48             | 183               | MLYAGEQISSYFTPTPLTDKACWPKSVTM<br>PLGPDLTSCMPIFA                                                                                                     |                    |           |
| Seq2                                                                    | 376            | 742               | MPWSRVLSLHPGWSVVVQSWLRATSASQI<br>QGFSCLSLLSSWDYRSQRRTDILPVFKEHHF<br>SPNRSYSIKESLGSCETPHPRTAAAAVEESCA<br>YWPLSSFSVQGGDLRRCVAWTLNNIIVLLP              |                    |           |
| Seq3                                                                    | 1184           | 1397              | MRLADKRQEMRGVLPEFSTSSKSVAQRGPI<br>NNGRPSHQPVFLKMKGDLALTEDKREQAQ<br>NEQSAWKFTPGR                                                                     |                    |           |
| Seq4                                                                    | 1362           | 1506              | MNRVPGSLRLVGKLSHILSQGFDPSTTRK<br>SLGGQPRTRFYTNTQTF                                                                                                  |                    |           |
| Seq5                                                                    | 1552           | 1630              | MVNVKLTNEPCTSVLSLPIRFASEAW                                                                                                                          |                    |           |
| Seq6                                                                    | 1574           | 1664              | MNLALQFFPSPSALLQKPGRLALSQRSGHL                                                                                                                      |                    |           |
| Seq7                                                                    | 1703           | 1778              | MFLFEENRGRNKVLRHTMSLDSSEK                                                                                                                           |                    |           |
| Seq8                                                                    | 1827           | 1911              | MENGLCIAALTLEHSDLETLKSRSSNNMD                                                                                                                       |                    |           |
| Seq9                                                                    | 1916           | 2048              | MTSKRKKIHFRSGPWSVWSFQVLPVSLWIF<br>SGYLVSSHIPQLCT                                                                                                    |                    |           |
| Seq10                                                                   | 1957           | 2095              | MVCVEFSGSPCVFVDFLWVLGFLPHPTAVH<br>MRLTGLSTWSQTGECE                                                                                                  |                    |           |
| Seq11                                                                   | 2116           | 2224              | MMEWSPIQGWPELPGWAPATQHSELKQE<br>VSKNLSRC                                                                                                            |                    |           |
| Seq12                                                                   | 2227           | 2620              | MRTFQHIGHFASKTVNFIIVVELLQNSNEIEQ<br>VEVETDFDASSRLLSKEEWRQHSVPALSENT<br>ARFQVTGLFCFRSDKFSTCLETLITYFFLPQKS<br>SSLFPALQPRKHSNYFKTPGDPLVLCKHGDQ<br>VTFQ |                    |           |
| Seq13                                                                   | 2309           | 2582              | MRLSKLRLRQISMLPQGYSARKNGDSTRCQ<br>LCLKTQPDSRLQGYSASDQINSPLAWKLSSPI<br>SFFPKNPPFSLHCSLGLSTATISKHQGTL                                                 |                    |           |
| <b>Coding potential calculator based on sequence intrinsic features</b> |                |                   |                                                                                                                                                     |                    |           |
| Sequence                                                                | Fickett score  | Isoelectric point | Peptide length (aa)                                                                                                                                 | Coding probability | Label     |
| WTAPP1                                                                  | 0.28           | 6.41              | 132                                                                                                                                                 | 0.42               | noncoding |

**Supplementary Table S6. Metastasis of xenografts derived from PDAC cells**

| <b>SW1990</b> |                |                  |                   |                    |                    |
|---------------|----------------|------------------|-------------------|--------------------|--------------------|
| <b>Mouse</b>  | <b>Control</b> | <b>WTAPP1-OE</b> | <b>KD-Control</b> | <b>WTAPP1-KD-1</b> | <b>WTAPP1-KD-2</b> |
| #1            | No metastasis  | Lung, Liver      | No metastasis     | No metastasis      | No metastasis      |
| #2            | No metastasis  | Liver            | No metastasis     | No metastasis      | No metastasis      |
| #3            | No metastasis  | Mesentery, Liver | No metastasis     | No metastasis      | No metastasis      |
| #4            | No metastasis  | Liver            | No metastasis     | No metastasis      | No metastasis      |
| #5            | Liver          | Liver            | Lung              | No metastasis      | No metastasis      |
| #6            | Liver          | Liver            | Liver             | No metastasis      | No metastasis      |
| #7            | Lung           | Lung, Liver      | Liver             | No metastasis      | No metastasis      |
| #8            | Liver          | Liver            | Liver             | No metastasis      | No metastasis      |

  

| <b>Capan-2</b> |                |                  |                   |                    |                    |
|----------------|----------------|------------------|-------------------|--------------------|--------------------|
| <b>Mouse</b>   | <b>Control</b> | <b>WTAPP1-OE</b> | <b>KD-Control</b> | <b>WTAPP1-KD-1</b> | <b>WTAPP1-KD-2</b> |
| #1             | No metastasis  | No metastasis    | No metastasis     | No metastasis      | No metastasis      |
| #2             | No metastasis  | Lung, Liver      | No metastasis     | No metastasis      | No metastasis      |
| #3             | No metastasis  | Liver            | No metastasis     | No metastasis      | No metastasis      |
| #4             | No metastasis  | Liver            | No metastasis     | No metastasis      | No metastasis      |
| #5             | Liver          | Lung, Liver      | No metastasis     | No metastasis      | No metastasis      |
| #6             | Lung           | Liver            | Liver             | No metastasis      | No metastasis      |
| #7             | Liver          | Liver            | Liver             | No metastasis      | No metastasis      |
| #8             | Liver          | Liver            | Liver             | No metastasis      | No metastasis      |
